# Supplementary material for: An assessment of recently published gene expression data analyses: reporting experimental design and statistical factors
Source: PubMed Central journal article supplement (PMC1523197; doi:10.1186/1472-6947-6-27), 2006-06-21
Supplement: 1472-6947-6-27-S1.pdf [file 1472-6947-6-27-S1.pdf]

## Origin of papers examined – List of journals

Am J Hum Genet  
Am J Obstet Gynecol  
Am J Pathol  
Am J Physiol Endocrinol Metab  
Appl Microbiol Biotechnol  
Artif Intell Med  
Biochem Pharmacol  
Biochim Biophys Acta  
Bioinformatics  
Biol Reprod  
Biosci Biotechnol Biochem  
Biosystems  
Biotechnol Bioeng  
Biotechnol Lett  
Blood  
BMC Bioinformatics  
BMC Cancer  
BMC Genomics  
BMC Womens Health  
Br J Haematol  
Breast Cancer Res  
Calcif Tissue Int  
Cancer  
Cancer Lett  
Cancer Res  
Carcinogenesis  
Cell Microbiol  
Chem Res Toxicol  
Clin Cancer Res  
Comput Biol Chem  
Curr Opin Biotechnol  
Cytogenet Genome Res  
Dev Biol  
Dev Dyn  
Dev Genes Evol  
Development  
Diabetes  
Endocr Relat Cancer  
Environ Health Perspect  
Epilepsy Res  
Exp Toxicol Pathol  
FEBS Lett  
Funct Integr Genomics  
Genetics.  
Genome  
Genome Biol  
Genome Res  
Genomics  
Hematology  
IEEE Trans Inf Technol Biomed  
Immunogenetics  
Infect Immun  
Int Arch Allergy Immunol  
Int Immunopharmacol  
Int J Cancer

Int J Med Inform  
J Anim Sci  
J Appl Physiol  
J Bacteriol  
J Bioinform Comput Biol  
J Biol Chem  
J Biomed Biotechnol  
J Biomed Inform  
J Biopharm Stat  
J Chem Inf Comput Sci  
J Clin Invest  
J Comput Biol  
J Exp Med  
J Hepatol  
J Med Genet J Mol Diagn  
J Microbiol Methods  
J Mol Med  
J Nutr  
J Pharmacol Exp Ther  
J Theor Biol  
J Virol  
Kidney Int  
Lancet  
Leukemia  
Medinfo  
Mol Biochem Parasitol  
Mol Cancer Ther  
Mol Psychiatry  
Mol Reprod Dev  
Mutat Res  
Nat Biotechnol  
Nat Genet  
Nature  
Nephrol Dial Transplant  
Neural Comput  
Neural Netw  
Neurobiol Dis  
Nucleic Acids Res  
Oncogene  
Pediatrics  
Pharm Res  
Physiol Genomics  
Plant J  
Plant Physiol  
PLoS Biol  
Proc Natl Acad Sci U S A  
Prostate  
Reprod Biol Endocrinol  
Reprod Toxicol  
Semin Cancer Biol  
Stat Med  
Stem Cells  
Toxicol Appl Pharmacol  
Toxicol Lett  
Toxicol Pathol  
Toxicol Sci  
Virology
